# Supplementary material for: Saturation mutagenesis reveals manifold determinants of exon definition
Source: HighWire-hosted journal article supplement (doi:10.1101/gr.219683.116), 2017-12-14
Supplement: Supplemental_Table_S6.xlsx [file Supplemental_Table_S6.xlsx]

## Sheet: R2val
Table S6. Significant correlations (signed R2) between LEI and binding affinity z scores of 7mers among mutants of HMB																-1					+1		+1
				Exonic position:
RBP#	RBPname (Ray et al., 2013)	Max.	Min.	-3	-2	-1	1	2	3	4	5	6	7	8	9	10	11	12	13	14	15	16	17	18	19	20	21	22	23	24	25	26	27	28	29	30	31	32	33	34	35	36	37	38	39	40	41	42	43
M001_0.6	A1C	-0.127424	-0.1564									-0.132121	-0.127424																														-0.1564
M002_0.6	ANKHD1, ANKRD17, ENSG00000249536	0.261633	0.0853142						0.123619	0.256038						0.13485				0.121972							0.11402		0.126228	0.149207	0.164649	0.0853142		0.119656	0.261633	0.224575	0.17751	0.103309	0.134568
M004_0.6	BRUNOL4	-0.0904676	-0.444738		-0.239503	-0.187362		-0.107992			-0.145061	-0.137753	-0.183966	-0.112276	-0.247554	-0.193965	-0.444738	-0.354686	-0.209708							-0.0904676	-0.221743									-0.103307	-0.131735	-0.182374	-0.19817	-0.197317	-0.181928	-0.15468	-0.196364	-0.214943	-0.21022	-0.136513	-0.232064	-0.203803
M012_0.6	CPEB2	0.337329	0.0966142	0.337329								0.0966142	0.110438			0.0987615	0.178822	0.188649	0.110003																					0.114814		0.107758
	DAZAP1	-0.115385	-0.614111	-0.264564	-0.336409	-0.335301	-0.496925	-0.302753	-0.238336	-0.378448	-0.467522	-0.498524	-0.430133	-0.388706	-0.326454	-0.391988	-0.379019	-0.23722	-0.129008	-0.419742	-0.396375	-0.147266	-0.447431	-0.121342	-0.118072	-0.163354	-0.267332	-0.222501	-0.347585	-0.321029	-0.399576	-0.190456	-0.237432	-0.115385	-0.131308		-0.162444	-0.346942	-0.285006	-0.438645	-0.509889	-0.53829	-0.614111	-0.46319	-0.374817	-0.335741	-0.363378	-0.274875	-0.240322
M016_0.6	FMR1	0.121778	-0.405496	-0.405496													-0.113875	-0.111098																	0.121778								-0.0955196
M019_0.6	SRSF12, Fusip1, BX5110121	0.11037	0.0931083						0.104642																																0.11037							0.0931083
M020_0.6	FXR2	0.108223	-0.130997														-0.130997	-0.122384																	0.108223
M021_0.6	G3BP2	0.217302	0.0877089			0.140112								0.102531	0.108505	0.0968843										0.169427	0.192085	0.13723	0.217302	0.165098	0.137537	0.0877089		0.151457	0.170987	0.114115	0.0936468	0.148619	0.174218	0.190203
M022_0.6	HNRNPA1, HNRNPA3, ENSG00000215492, ENSG00000231942	-0.121997	-0.619169	-0.590496	-0.201733	-0.226002	-0.367645	-0.237373		-0.139164	-0.333244	-0.450775	-0.450635	-0.619169	-0.401053	-0.43099	-0.483848	-0.292544	-0.202508	-0.162819	-0.156963		-0.166244						-0.259306	-0.199023	-0.121997							-0.154141	-0.128525	-0.206496	-0.315804	-0.394772	-0.541732	-0.444694	-0.203743	-0.145371	-0.136041	-0.130869
M023_0.6	HNRNPA1L2	-0.0938107	-0.481301	-0.463019	-0.185335	-0.247238	-0.372987	-0.197302		-0.101599	-0.336567	-0.336164	-0.377935	-0.481301	-0.172752	-0.3161	-0.180906	-0.206123	-0.282509	-0.238392	-0.17135	-0.143422	-0.221392	-0.150067		-0.144427	-0.222498	-0.125626	-0.249538	-0.23544	-0.211132						-0.119335	-0.189421	-0.195529	-0.247497	-0.312565	-0.307765	-0.357524	-0.299668	-0.0938107	-0.121369
M024_0.6	HNRNPA2B1	-0.0938512	-0.628279	-0.628279	-0.260699	-0.16567	-0.283257	-0.157414		-0.121239	-0.33159	-0.539636	-0.51733	-0.603985	-0.370449	-0.310952	-0.379285	-0.26537	-0.191135	-0.130199	-0.120865		-0.0938512						-0.155529	-0.109702	-0.100879							-0.124776		-0.198461	-0.231823	-0.360528	-0.526284	-0.400689	-0.15525
M025_0.6	HNRNPC	0.170326	0.0895243													0.116823	0.170326	0.149722	0.0895243								0.0898806													0.0922522		0.0973682
M026_0.6	hnRNPK	0.370875	0.0901806			0.133332	0.177772	0.16034	0.115661	0.0997511		0.134681	0.219168	0.163564	0.175591	0.30702	0.370875	0.232286	0.118888	0.0901806	0.0968525		0.133146				0.101675				0.0909098	0.14698	0.141148					0.0927937		0.0962044	0.168657	0.196059	0.204509	0.186356	0.105499		0.124465
M027_0.6	HNRNPL	0.215512	0.0908744						0.0908744						0.116503	0.188901	0.215512																														0.100637	0.140412
M031_0.6	ELAVL1	-0.087204	-0.223259			-0.168654	-0.130624	-0.135117	-0.102078														-0.223259							-0.087204
M032_0.6	IGF2BP2	0.187055	-0.114685												0.0873682		0.187055							-0.114685																								0.125141
M033_0.6	KHDRBS3	0.131206	-0.148815										-0.124078				0.131206														-0.148815	-0.142693	-0.101713														-0.101216
M035_0.6	LIN28A, LIN28B	-0.105026	-0.227841	-0.227841														-0.110015	-0.185698																	-0.194373	-0.105026			-0.105919
M036_0.6	MATR3	0.366962	0.267516	0.366962													0.267516
M037_0.6	MBNL3, MBNL2, MBNL1	0.168548	-0.168126														0.122519	0.168548	-0.102381	-0.164492	-0.168126
M040_0.6	MSI1, MSI2	-0.0894735	-0.402242			-0.183099	-0.283501	-0.239028	-0.134134	-0.168834	-0.302544	-0.356263	-0.152989	-0.209309	-0.206559	-0.212576	-0.143303	-0.186828	-0.0894735	-0.162915	-0.313913	-0.224402	-0.377536	-0.22204	-0.104499	-0.0986686	-0.199482	-0.143736	-0.230373	-0.133848	-0.100154							-0.0983453	-0.141927	-0.232177	-0.376792	-0.399838	-0.388588	-0.402242	-0.289575	-0.1575	-0.105745	-0.107758	-0.114055
M042_0.6	PABPC4, ENSG00000250177	0.0983762	-0.0897543														0.0983762																	-0.0897543
M043_0.6	PCBP2	0.439843	-0.0890635	0.439843								0.126229	0.209918	0.0948092	0.11995		0.220561	0.151004																-0.0868376	-0.0890635								0.162666	0.132009	0.0975358
M044_0.6	PPRC1	0.237316	0.0860197						0.104924	0.218951	0.113304					0.0971278				0.086136		0.0972573	0.237316	0.179451	0.129614	0.097449	0.0902696						0.0895268	0.215514	0.134845	0.0860197					0.091761
M046_0.6	QKI	0.371618	-0.109765	0.371618								0.124818	0.148802				0.0955184	0.105925																-0.104615	-0.109765								0.102785		0.107389
M047_0.6	RBM28	-0.0890614	-0.266132		-0.168318	-0.175952	-0.15748												-0.155416			-0.109517		-0.105416		-0.0942595	-0.179251			-0.0890614	-0.151049					-0.159044	-0.190692	-0.237836	-0.266132	-0.159725	-0.114556
M048_0.6	CIRBP, RBM3	0.251714	-0.0865657											0.157232	0.128432	0.122005	0.251714		-0.0865657																								0.0995551					0.117504
M049_0.6	RBM38	-0.0988631	-0.128455												-0.106281		-0.11119																												-0.113319		-0.0988631	-0.128455
M050_0.6	RBM4B, RBM4, RBM4	0.210334	0.0887672						0.140896	0.200806	0.111975		0.0926501			0.154305										0.170773	0.095671	0.17554	0.15703				0.171216	0.210334	0.171284	0.136472	0.111953	0.111506			0.0934077		0.0887672
M051_0.6	RBM41	0.0967199	0.0855466								0.0928599						0.0967199														0.0855466
M052_0.6	RBM46	0.300885	0.097333			0.193772								0.097333	0.118496	0.198212	0.300885	0.128152	0.206905		0.103228	0.102892					0.0991528											0.138994
M053_0.6	RBM5	-0.0870671	-0.648236	-0.648236								-0.0896843	-0.17477		-0.0953677	-0.138878	-0.29844	-0.198788	-0.14638													-0.0870671
M054_0.6	RBM8A	0.225885	0.0860808						0.170244	0.209877	0.0987728	0.160188	0.225885	0.0860808		0.113215	0.165937	0.0988308	0.132926	0.0886246	0.175579	0.137425	0.196556	0.180717	0.119108		0.101347		0.0899191				0.0869866	0.121765							0.0956642	0.100657	0.154219	0.198585
M055_0.6	RBMS3	0.0933134	-0.180346				-0.106001			-0.0886277		-0.150397	-0.105289				0.0933134						-0.180346	-0.0910298						-0.118077
M056_0.6	SRSF3	0.0989917	-0.0936701												0.0989917										0.087269						-0.0936701
M061_0.6	SAMD4A, SAMD4B	0.180213	-0.160675																												0.180213								0.104164
M065_0.6	SRSF9	0.241813	0.0973642																												0.0973642			0.109046	0.241813	0.156008	0.131994	0.16428	0.192293	0.12282
M068_0.6	SNRNP70	0.232485	0.0881003	0.232485					0.141892								0.155845																								0.0881003
M069_0.6	SNRPA	0.152044	-0.200219								0.0901754				0.134539	0.0995626	0.122437							-0.200219		0.132251	0.152044														0.126961
M070_0.6	SRSF2, ENSG00000180771	0.0962779	-0.333614	-0.333614														-0.1118	-0.105493																0.0962779
M071_0.6	SRSF7	0.311263	0.0920819			0.127881			0.105391	0.112373	0.125088													0.190843	0.259339	0.115823	0.164431	0.117987	0.142983	0.103068			0.0920819	0.269151	0.311263	0.229984	0.234155	0.157244	0.169976	0.179802	0.120724
M073_0.6	STAR-PAP	0.403316	-0.115988	0.403316													0.207696									-0.0859354	-0.115988
M074_0.6	TARDBP	-0.187248	-0.308427	-0.308427													-0.189379	-0.187248
M075_0.6	TIA1	-0.0937555	-0.503851			-0.227661	-0.235282	-0.241749	-0.223347	-0.219177	-0.223282	-0.122588		-0.10187		-0.0937555			-0.278638	-0.292831	-0.18764	-0.396691	-0.503851	-0.439049	-0.261002	-0.218843	-0.219832		-0.200807	-0.204625	-0.254598	-0.114796		-0.144885			-0.178773	-0.163643	-0.178774	-0.210596	-0.145052	-0.145498		-0.142673		-0.103774			-0.148725
M077_0.6	U2AF2	0.110206	0.0925577									0.0925577					0.110206
M081_0.6	CSDA, YB-1	0.271843	0.0863791						0.0971135		0.110331	0.0938375		0.10475		0.271843												0.207613	0.130643				0.114086	0.0863791	0.210824	0.106815							0.0882309			0.121265		0.126524
M082_0.6	YBX2	0.17468	-0.101135						0.157922		0.129131	0.147051							-0.101135									0.152351	0.119836												0.0911443	0.0875945	0.145422	0.17468	0.109696
M085_0.6	ZCRB1	-0.0857546	-0.215547		-0.215547		-0.107433			-0.181151	-0.0915126	-0.0996824	-0.166182						-0.120868	-0.211408										-0.119079	-0.159882	-0.124401	-0.101954			-0.0857546
M089_0.6	HNRNPL, ENSG00000215042	0.243919	0.0967745			0.239258	0.167127	0.0967745	0.243919	0.106867					0.138804	0.103862	0.217167																								0.170112							0.190463	0.104695
M102_0.6	SRSF1	0.21346	-0.28999	-0.28999							0.120303					0.0964812																		0.185052	0.21346	0.142409	0.132323	0.175691	0.164299					0.0891592
M122_0.6	MEX3C, MEX3D, MEX3B	-0.0857845	-0.350681		-0.350681	-0.167947						-0.109462	-0.0923052		-0.0857845			-0.18026	-0.136347																								-0.12513	-0.0884129	-0.141427
M126_0.6	SRSF4, SRSF6	0.101141	-0.535445	-0.535445									-0.0939141				-0.186609	-0.172174																	0.101141
M136_0.6	SNRPB2	0.109862	-0.250528																					-0.250528		0.104245	0.109862														0.0877491
M140_0.6	ENOX1, ENOX2	0.16483	0.0975723										0.101261			0.102719			0.111115	0.101318				0.122017										0.16483	0.132164	0.131838					0.0975723			0.129791
M141_0.6	ESRP2, ESRP1	0.202864	-0.495732	-0.495732								-0.188949	-0.414126	-0.354609	-0.256183	-0.246863	-0.362337	-0.1831				0.202864		0.0992971																		-0.165224	-0.258164	-0.159022	-0.10836		-0.0958374
M142_0.6	RBM42	0.321342	-0.17625			0.140759	0.101339	0.110463									0.321342	0.141034		-0.17625		-0.107637																							0.150317
M143_0.6	RBMS2, RBMS1, ENSG00000213250	-0.123075	-0.23317				-0.131562			-0.131154		-0.23317	-0.225202	-0.142969									-0.134728						-0.166237	-0.22783	-0.123075												-0.163145
M144_0.6	PABPC3	0.179775	0.0939539			0.148562	0.138765																0.0939539	0.171626			0.161866										0.106278	0.179775	0.128308	0.10309	0.108753
M147_0.6	CNOT4	0.108175	-0.111809																			0.108175												-0.111809													0.0895593	0.0941664
M148_0.6	PABPN1, PABPN1L	0.218261	0.086445								0.218261	0.19828				0.104228							0.106831	0.190187			0.109252										0.086445	0.100953
M149_0.6	CPEB3, CPEB4	0.166094	-0.19563				-0.110506		-0.111012						-0.136602		-0.16045	-0.183833	-0.105991			-0.102535	-0.19563			0.166094																			-0.0902824
M150_0.6	RALY	0.119565	-0.150837			-0.150837	-0.127209		-0.105422			0.109039	0.119565										-0.131196												-0.115236				-0.107628
M151_0.6	HNRNPH2, HNRNPH1, HNRNPF	-0.095252	-0.610182	-0.610182								-0.154298	-0.328124	-0.1343	-0.252599	-0.236155	-0.41374	-0.357544	-0.118684	-0.10851	-0.115909																	-0.095252				-0.123836	-0.207437	-0.099531
M152_0.6	FXR1	0.174199	-0.13744											0.153934	0.174199			-0.13744																	0.160623
M155_0.6	ZNF638	0.101664	-0.132399							0.088789									-0.0949229								-0.132399																0.101664
M157_0.6	CELF3, BRUNOL5	-0.085459	-0.410411		-0.16358	-0.145394		-0.085459				-0.0885589			-0.258739	-0.123934	-0.410411	-0.31871									-0.177378											-0.184434	-0.131564	-0.159914	-0.147413	-0.0873886	-0.101435	-0.151126	-0.215698		-0.132942	-0.201344
M158_0.6	HNRNPCL1	0.0910375	0.0910375																								0.0910375
M159_0.6	A2BP1, RBFOX2, RBFOX3	-0.310742	-0.310742	-0.310742
M160_0.6	KHDRBS1	0.340263	-0.119635							-0.091295					0.0934298	0.132589	0.340263	0.20104	0.151851															-0.119635	-0.115453
M161_0.6	RBM6	0.266263	0.0859919						0.140109	0.190977	0.118268	0.197579	0.266263	0.174116	0.133413	0.211449	0.230518						0.0859919						0.1024				0.0952943								0.0868046	0.177154	0.255165
M162_0.6	PABPC5	0.210299	-0.137312											0.119102	0.118443	0.0940147	0.210299					-0.0942944		-0.111267		-0.0930298								-0.137312														0.119426
M163_0.6	IGF2BP3	0.151853	0.0872918						0.129376						0.1387	0.114124	0.151853																								0.0993874						0.0872918	0.118096
M168_0.6	SFPQ, PSPC1	-0.0931239	-0.230142								-0.0955084	-0.0962263																			-0.154268					-0.141714	-0.111199		-0.0931239	-0.150258	-0.128346
M169_0.6	hnRNPLL	0.0990247	0.0952399						0.0952399																		0.0990247													0.0981371
M175_0.6	RBM24	-0.0895902	-0.215718														-0.215718	-0.201348																										-0.0895902	-0.0954956
M176_0.6	KHDRBS2	0.205542	-0.157187							-0.117746			-0.0866852				0.205542	0.128478		-0.0873637										-0.101865	-0.157187	-0.146515	-0.119568		-0.139092
M177_0.6	PCBP1	0.394472	0.0858601	0.394472			0.106572					0.228213	0.291975	0.191942	0.198296	0.226135	0.360327	0.182131	0.0993456		0.0904369										0.0893379	0.0858601										0.187826	0.245469	0.200717	0.105226
M178_0.6	BRUNOL6	-0.0889573	-0.231279					-0.099405				-0.0972578			-0.132663		-0.199405	-0.158181									-0.134494												-0.108459	-0.122064	-0.102468		-0.0981613	-0.108449	-0.214805	-0.0889573	-0.231279	-0.175942
M188_0.6	PCBP4, PCBP3	0.39964	0.0855651	0.23936			0.109624			0.0855651	0.0989269	0.191155	0.212787	0.165803	0.156979	0.306324	0.39964	0.239834	0.141086		0.0968602										0.119429	0.142251	0.102247								0.121498	0.195501	0.221437	0.167488	0.123874		0.105016
M209_0.6	RBM45	0.291393	0.106087						0.122059																									0.155887	0.291393	0.223091	0.190863	0.138595		0.106087	0.109292
M210_0.6	HNRPDL	-0.0907058	-0.469276	-0.256748	-0.242848	-0.262426	-0.392939	-0.349369	-0.255911	-0.276873	-0.396504	-0.394779	-0.186382	-0.217113	-0.256258	-0.280606	-0.261765	-0.222805	-0.221919	-0.208531	-0.294821	-0.160495	-0.402385	-0.258109			-0.261059	-0.163709	-0.364888	-0.289592	-0.205599	-0.105497	-0.115328			-0.0907058	-0.132021	-0.227138	-0.226742	-0.275601	-0.453291	-0.418506	-0.469276	-0.396321	-0.320581	-0.157392	-0.141313	-0.0989423	-0.104209
M227_0.6	PTBP1, PTBP2, ROD1 (HNRNPI)	0.294975	-0.188812	0.294975	0.162445												0.274325	0.0953789		-0.163673		-0.188812
M231_0.6	EIF2S1	0.225742	0.096005			0.181094	0.206305	0.208689	0.225742	0.16964		0.105511		0.123226		0.162472										0.096005	0.137804				0.0994478							0.143463	0.148905	0.199621	0.221624
M234_0.6	RBM47	0.17037	-0.123501			0.17037																																					-0.123501
M236_0.6	SYNCRIP	0.207853	0.0962188												0.124178	0.207853											0.0998638										0.102159	0.11314	0.0962188								0.104947	0.0981731
M242_0.6	HNRNPR	0.415051	0.0907538	0.27662			0.125026	0.100608					0.0970879	0.110631	0.136949	0.196583	0.415051	0.243146	0.184419		0.107291																					0.0940875	0.130372	0.150811	0.114392		0.0907538
	RBPs in red, as well as HNRNPD, were chosen for in vitro binding analysis.
Significant positive correlations by position				10	1	9	9	6	18	12	13	15	13	15	20	27	32	16	11	6	7	6	7	8	5	9	18	6	9	4	10	6	9	12	16	11	11	14	10	11	19	10	14	10	9	2	8	11	2
Significant negative correlations by position				15	10	13	14	11	7	12	10	19	18	11	15	12	19	22	20	13	9	10	12	11	3	8	11	4	8	13	14	7	5	8	6	6	8	11	12	13	12	11	16	14	14	8	10	8	4
Total significant correlations by position				25	11	22	23	17	25	24	23	34	31	26	35	39	51	38	31	19	16	16	19	19	8	17	29	10	17	17	24	13	14	20	22	17	19	25	22	24	31	21	30	24	23	10	18	19	6
	Position			-3	-2	-1	1	2	3	4	5	6	7	8	9	10	11	12	13	14	15	16	17	18	19	20	21	22	23	24	25	26	27	28	29	30	31	32	33	34	35	36	37	38	39	40	41	42	43
				-1	-0.95	-0.9	-0.85	-0.8	-0.75	-0.7	-0.65	-0.6	-0.55	-0.5	-0.45	-0.4	-0.35	-0.3	-0.25	-0.2	-0.15	-0.1	-0.05	0	0.05	0.1	0.15	0.2	0.25	0.3	0.35	0.4	0.45	0.5	0.55	0.6	0.65	0.7	0.75	0.8	0.85	0.9	0.95	1
				-1	-0.95	-0.9	-0.85	-0.8	-0.75	-0.7	-0.65	-0.6	-0.55	-0.5	-0.45	-0.4	-0.35	-0.3	-0.25	-0.2	-0.15	-0.1	-0.05	0	0.05	0.1	0.15	0.2	0.25	0.3	0.35	0.4	0.45	0.5	0.55	0.6	0.65	0.7	0.75	0.8	0.85	0.9	0.95	1
				-1	-0.95	-0.9	-0.85	-0.8	-0.75	-0.7	-0.65	-0.6	-0.55	-0.5	-0.45	-0.4	-0.35	-0.3	-0.25	-0.2	-0.15	-0.1	-0.05	0	0.05	0.1	0.15	0.2	0.25	0.3	0.35	0.4	0.45	0.5	0.55	0.6	0.65	0.7	0.75	0.8	0.85	0.9	0.95	1
[truncated: 5 more columns]
