# Supplementary material for: Saturation mutagenesis reveals manifold determinants of exon definition
Source: HighWire-hosted journal article supplement (doi:10.1101/gr.219683.116), 2017-12-14
Supplement: Supplemental_Table_S8.xlsx [file Supplemental_Table_S8.xlsx]

## Sheet: Sheet1
Summary:				Correlations of score changes to experimental PSI						Correlations between scores of different methods
				Method	∆tESRseq	∆Hexplorer	∆HAL	∆SMS	Mutants	r2	∆tESRseq	∆Hexplorer	∆HAL	∆SMS
Average of the 4 exons				correl (r)	0.715346	0.658254	0.683271	0.705103		∆Hexplorer	0.519793	1	0.540962	0.47822
				r2	0.512022	0.437322	0.478749	0.500286		∆HAL	0.443611	0.540962	1	0.55165
										∆SMS	0.495965	0.47822	0.55165	1
			Exon source	BRCA1	BRCA2	CFTR	MLH1	Total
			No. of mutants:	36	32	41	15	124
Details:
BRCA1	ex 6	89 nt	36 mutants	correl (r)	0.688198	0.709515	0.709472	0.786907
				r2	0.473616	0.503411	0.50335	0.619222
					∆tESRseq	∆Hexplorer	∆HAL	∆SMS
	Exon position	Mutation	Exon sequence	PSI		0		0		r2	∆tESRseq	∆Hexplorer	∆HAL	∆SMS
0		WT	GAGCCTACAAGAAAGTACGAGATTTAGTCAACTTGTTGAAGAGCTATTGAAAATCATTTGTGCTTTTCAGCTTGACACAGGTTTGGAGT	70	-3.94	-105.2	-68.3	-2.04028		∆Hexplorer	0.57298	1	0.760299	0.623544
1	12	A>T	GAGCCTACAAGTAAGTACGAGATTTAGTCAACTTGTTGAAGAGCTATTGAAAATCATTTGTGCTTTTCAGCTTGACACAGGTTTGGAGT	54	-0.55	-75.58	-57.5	-2.58143		∆HAL	0.562657	0.760299	1	0.669411
2	18	C>A	GAGCCTACAAGAAAGTAAGAGATTTAGTCAACTTGTTGAAGAGCTATTGAAAATCATTTGTGCTTTTCAGCTTGACACAGGTTTGGAGT	58	-2.01	-61.59	-41.6	-3.20803		∆SMS	0.578628	0.623544	0.669411	1
3	18	C>G	GAGCCTACAAGAAAGTAGGAGATTTAGTCAACTTGTTGAAGAGCTATTGAAAATCATTTGTGCTTTTCAGCTTGACACAGGTTTGGAGT	55	-2.51	-84.89	-65.9	-2.9236
4	19	G>T	GAGCCTACAAGAAAGTACTAGATTTAGTCAACTTGTTGAAGAGCTATTGAAAATCATTTGTGCTTTTCAGCTTGACACAGGTTTGGAGT	39	-0.79	-6.48	-1.8	-0.323307
5	12	A>G	GAGCCTACAAGGAAGTACGAGATTTAGTCAACTTGTTGAAGAGCTATTGAAAATCATTTGTGCTTTTCAGCTTGACACAGGTTTGGAGT	73	-0.59	-7.74	-13.6	-0.570834
6	13	A>C	GAGCCTACAAGACAGTACGAGATTTAGTCAACTTGTTGAAGAGCTATTGAAAATCATTTGTGCTTTTCAGCTTGACACAGGTTTGGAGT	73	-0.11	-20.79	-0.9	0.0810998
7	13	A>G	GAGCCTACAAGAGAGTACGAGATTTAGTCAACTTGTTGAAGAGCTATTGAAAATCATTTGTGCTTTTCAGCTTGACACAGGTTTGGAGT	78	-2.61	-62.16	-50.2	-1.99513
8	13	A>T	GAGCCTACAAGATAGTACGAGATTTAGTCAACTTGTTGAAGAGCTATTGAAAATCATTTGTGCTTTTCAGCTTGACACAGGTTTGGAGT	64	1.48	0.78	13.5	1.29355
9	14	A>C	GAGCCTACAAGAACGTACGAGATTTAGTCAACTTGTTGAAGAGCTATTGAAAATCATTTGTGCTTTTCAGCTTGACACAGGTTTGGAGT	71	-0.2	9.09	-23.3	-0.79234
10	14	A>G	GAGCCTACAAGAAGGTACGAGATTTAGTCAACTTGTTGAAGAGCTATTGAAAATCATTTGTGCTTTTCAGCTTGACACAGGTTTGGAGT	75	0.16	-36.01	-11.5	0.0203528
11	14	A>T	GAGCCTACAAGAATGTACGAGATTTAGTCAACTTGTTGAAGAGCTATTGAAAATCATTTGTGCTTTTCAGCTTGACACAGGTTTGGAGT	77	0	-22.58	1.2	0.0818602
12	15	G>A	GAGCCTACAAGAAAATACGAGATTTAGTCAACTTGTTGAAGAGCTATTGAAAATCATTTGTGCTTTTCAGCTTGACACAGGTTTGGAGT	67	1.89	26.08	24.2	1.19866
13	15	G>C	GAGCCTACAAGAAACTACGAGATTTAGTCAACTTGTTGAAGAGCTATTGAAAATCATTTGTGCTTTTCAGCTTGACACAGGTTTGGAGT	79	0.31	-24.03	-21.7	-0.414365
14	15	G>T	GAGCCTACAAGAAATTACGAGATTTAGTCAACTTGTTGAAGAGCTATTGAAAATCATTTGTGCTTTTCAGCTTGACACAGGTTTGGAGT	74	0.85	6.44	8.9	-0.12193
15	17	A>C	GAGCCTACAAGAAAGTCCGAGATTTAGTCAACTTGTTGAAGAGCTATTGAAAATCATTTGTGCTTTTCAGCTTGACACAGGTTTGGAGT	79	-0.89	-54.16	-61	-1.99527
16	18	C>T	GAGCCTACAAGAAAGTATGAGATTTAGTCAACTTGTTGAAGAGCTATTGAAAATCATTTGTGCTTTTCAGCTTGACACAGGTTTGGAGT	66	0.65	4.7	11.6	-0.740109
17	19	G>A	GAGCCTACAAGAAAGTACAAGATTTAGTCAACTTGTTGAAGAGCTATTGAAAATCATTTGTGCTTTTCAGCTTGACACAGGTTTGGAGT	71	-0.67	-8.76	-1.5	-1.08855
18	19	G>C	GAGCCTACAAGAAAGTACCAGATTTAGTCAACTTGTTGAAGAGCTATTGAAAATCATTTGTGCTTTTCAGCTTGACACAGGTTTGGAGT	66	0.65	-20.68	-42.3	0.277556
19	20	A>G	GAGCCTACAAGAAAGTACGGGATTTAGTCAACTTGTTGAAGAGCTATTGAAAATCATTTGTGCTTTTCAGCTTGACACAGGTTTGGAGT	77	-0.27	-48.57	-1.9	-0.00398347
20	20	A>T	GAGCCTACAAGAAAGTACGTGATTTAGTCAACTTGTTGAAGAGCTATTGAAAATCATTTGTGCTTTTCAGCTTGACACAGGTTTGGAGT	75	-0.91	-39.94	-22.6	-0.349389
21	21	G>A	GAGCCTACAAGAAAGTACGAAATTTAGTCAACTTGTTGAAGAGCTATTGAAAATCATTTGTGCTTTTCAGCTTGACACAGGTTTGGAGT	67	0.08	-27.97	3.4	0.379383
22	21	G>C	GAGCCTACAAGAAAGTACGACATTTAGTCAACTTGTTGAAGAGCTATTGAAAATCATTTGTGCTTTTCAGCTTGACACAGGTTTGGAGT	78	-1.79	-72.41	-53.9	-0.866817
23	21	G>T	GAGCCTACAAGAAAGTACGATATTTAGTCAACTTGTTGAAGAGCTATTGAAAATCATTTGTGCTTTTCAGCTTGACACAGGTTTGGAGT	65	-1.59	-5.4	1.2	-0.416546
24	22	A>C	GAGCCTACAAGAAAGTACGAGCTTTAGTCAACTTGTTGAAGAGCTATTGAAAATCATTTGTGCTTTTCAGCTTGACACAGGTTTGGAGT	70	-1.71	-18.26	-44	-0.554635
25	22	A>G	GAGCCTACAAGAAAGTACGAGGTTTAGTCAACTTGTTGAAGAGCTATTGAAAATCATTTGTGCTTTTCAGCTTGACACAGGTTTGGAGT	65	-0.98	-52.39	-42.4	-0.724701
26	22	A>T	GAGCCTACAAGAAAGTACGAGTTTTAGTCAACTTGTTGAAGAGCTATTGAAAATCATTTGTGCTTTTCAGCTTGACACAGGTTTGGAGT	78	-0.02	24.96	19.2	0.448025
27	23	T>A	GAGCCTACAAGAAAGTACGAGAATTAGTCAACTTGTTGAAGAGCTATTGAAAATCATTTGTGCTTTTCAGCTTGACACAGGTTTGGAGT	80	-0.17	21.8	9.3	0.176392
28	23	T>G	GAGCCTACAAGAAAGTACGAGAGTTAGTCAACTTGTTGAAGAGCTATTGAAAATCATTTGTGCTTTTCAGCTTGACACAGGTTTGGAGT	66	-1.61	-13.89	-18.1	-0.635159
29	12	A>C	GAGCCTACAAGCAAGTACGAGATTTAGTCAACTTGTTGAAGAGCTATTGAAAATCATTTGTGCTTTTCAGCTTGACACAGGTTTGGAGT	85	2.42	55.65	23.3	1.63823
30	16	T>A	GAGCCTACAAGAAAGAACGAGATTTAGTCAACTTGTTGAAGAGCTATTGAAAATCATTTGTGCTTTTCAGCTTGACACAGGTTTGGAGT	83	0.3	21.3	24.3	0.408401
31	16	T>C	GAGCCTACAAGAAAGCACGAGATTTAGTCAACTTGTTGAAGAGCTATTGAAAATCATTTGTGCTTTTCAGCTTGACACAGGTTTGGAGT	82	2.47	39.72	21.4	0.55298
32	16	T>G	GAGCCTACAAGAAAGGACGAGATTTAGTCAACTTGTTGAAGAGCTATTGAAAATCATTTGTGCTTTTCAGCTTGACACAGGTTTGGAGT	85	0.35	0.92	2.5	0.510203
33	17	A>G	GAGCCTACAAGAAAGTGCGAGATTTAGTCAACTTGTTGAAGAGCTATTGAAAATCATTTGTGCTTTTCAGCTTGACACAGGTTTGGAGT	86	2.17	3.97	10	0.670773
34	17	A>T	GAGCCTACAAGAAAGTTCGAGATTTAGTCAACTTGTTGAAGAGCTATTGAAAATCATTTGTGCTTTTCAGCTTGACACAGGTTTGGAGT	81	0.94	-18.44	7.7	-0.247586
35	20	A>C	GAGCCTACAAGAAAGTACGCGATTTAGTCAACTTGTTGAAGAGCTATTGAAAATCATTTGTGCTTTTCAGCTTGACACAGGTTTGGAGT	85	-0.22	24.44	21.8	1.00538
36	23	T>C	GAGCCTACAAGAAAGTACGAGACTTAGTCAACTTGTTGAAGAGCTATTGAAAATCATTTGTGCTTTTCAGCTTGACACAGGTTTGGAGT	82
BRCA2	ex 7	115 nt	32 mutants	correl (r)	0.735456	0.551724	0.744126	0.714535
				r2	0.540896	0.304399	0.553724	0.51056
					∆tESRseq	∆Hexplorer	∆HAL	∆SMS
	Exon position	Mutation	Exon sequence	PSI	0	0		0		r2	∆tESRseq	∆Hexplorer	∆HAL	∆SMS
0		WT	GGTCGTCAGACACCAAAACATATTTCTGAAAGTCTAGGAGCTGAGGTGGATCCTGATATGTCTTGGTCAAGTTCTTTAGCTACACCACCCACCCTTAGTTCTACTGTGCTCATAG	89	-0.08	35.53	4.1	-0.110609		∆Hexplorer	0.51954	1	0.454599	0.354827
1	2	delG	GTCGTCAGACACCAAAACATATTTCTGAAAGTCTAGGAGCTGAGGTGGATCCTGATATGTCTTGGTCAAGTTCTTTAGCTACACCACCCACCCTTAGTTCTACTGTGCTCATAG	90	0.204	29.88	6.9	0.526183		∆HAL	0.395662	0.454599	1	0.476324
2	2	G>T	GTTCGTCAGACACCAAAACATATTTCTGAAAGTCTAGGAGCTGAGGTGGATCCTGATATGTCTTGGTCAAGTTCTTTAGCTACACCACCCACCCTTAGTTCTACTGTGCTCATAG	88	-2.81	-58.56	-5.5	-0.422186		∆SMS	0.474636	0.354827	0.476324	1
3	4	C>T	GGTTGTCAGACACCAAAACATATTTCTGAAAGTCTAGGAGCTGAGGTGGATCCTGATATGTCTTGGTCAAGTTCTTTAGCTACACCACCCACCCTTAGTTCTACTGTGCTCATAG	39	-1.35	7.97	-3.4	-0.0345397
4	5	G>A	GGTCATCAGACACCAAAACATATTTCTGAAAGTCTAGGAGCTGAGGTGGATCCTGATATGTCTTGGTCAAGTTCTTTAGCTACACCACCCACCCTTAGTTCTACTGTGCTCATAG	80	-0.35	-2.44	4.2	0.630561
5	6	T>G	GGTCGGCAGACACCAAAACATATTTCTGAAAGTCTAGGAGCTGAGGTGGATCCTGATATGTCTTGGTCAAGTTCTTTAGCTACACCACCCACCCTTAGTTCTACTGTGCTCATAG	89	1.05	20.35	7.4	0.561624
6	16	A>C	GGTCGTCAGACACCACAACATATTTCTGAAAGTCTAGGAGCTGAGGTGGATCCTGATATGTCTTGGTCAAGTTCTTTAGCTACACCACCCACCCTTAGTTCTACTGTGCTCATAG	89	0.74	27.87	6.9	0.541509
7	18	A>G	GGTCGTCAGACACCAAAGCATATTTCTGAAAGTCTAGGAGCTGAGGTGGATCCTGATATGTCTTGGTCAAGTTCTTTAGCTACACCACCCACCCTTAGTTCTACTGTGCTCATAG	87	1.61	35.5	7	0.39079
8	22	delAT	GGTCGTCAGACACCAAAACATTTCTGAAAGTCTAGGAGCTGAGGTGGATCCTGATATGTCTTGGTCAAGTTCTTTAGCTACACCACCCACCCTTAGTTCTACTGTGCTCATAG	90	1.93	70.66	10	0.890088
9	23	T>C	GGTCGTCAGACACCAAAACATACTTCTGAAAGTCTAGGAGCTGAGGTGGATCCTGATATGTCTTGGTCAAGTTCTTTAGCTACACCACCCACCCTTAGTTCTACTGTGCTCATAG	90	-0.22	15.08	6	0.339589
10	33	T>C	GGTCGTCAGACACCAAAACATATTTCTGAAAGCCTAGGAGCTGAGGTGGATCCTGATATGTCTTGGTCAAGTTCTTTAGCTACACCACCCACCCTTAGTTCTACTGTGCTCATAG	90	1.91	86.59	10.5	1.12739
11	35	T>C	GGTCGTCAGACACCAAAACATATTTCTGAAAGTCCAGGAGCTGAGGTGGATCCTGATATGTCTTGGTCAAGTTCTTTAGCTACACCACCCACCCTTAGTTCTACTGTGCTCATAG	90	-2.42	-30.18	-45.2	-1.54099
12	43	G>A	GGTCGTCAGACACCAAAACATATTTCTGAAAGTCTAGGAGCTAAGGTGGATCCTGATATGTCTTGGTCAAGTTCTTTAGCTACACCACCCACCCTTAGTTCTACTGTGCTCATAG	67	-0.68	-49.55	-39.1	0.276472
13	56	A>T	GGTCGTCAGACACCAAAACATATTTCTGAAAGTCTAGGAGCTGAGGTGGATCCTGTTATGTCTTGGTCAAGTTCTTTAGCTACACCACCCACCCTTAGTTCTACTGTGCTCATAG	84	-0.63	-27.37	-3.9	1.03897
14	56	A>CT	GGTCGTCAGACACCAAAACATATTTCTGAAAGTCTAGGAGCTGAGGTGGATCCTGCTTATGTCTTGGTCAAGTTCTTTAGCTACACCACCCACCCTTAGTTCTACTGTGCTCATAG	89	0.46	27.67	6.4	0.935683
15	57	T>C	GGTCGTCAGACACCAAAACATATTTCTGAAAGTCTAGGAGCTGAGGTGGATCCTGACATGTCTTGGTCAAGTTCTTTAGCTACACCACCCACCCTTAGTTCTACTGTGCTCATAG	91	0.94	43.91	8.9	0.974201
16	58	delAT	GGTCGTCAGACACCAAAACATATTTCTGAAAGTCTAGGAGCTGAGGTGGATCCTGATGTCTTGGTCAAGTTCTTTAGCTACACCACCCACCCTTAGTTCTACTGTGCTCATAG	95	1.403	52.7	10.8	0.771019
17	59	T>C	GGTCGTCAGACACCAAAACATATTTCTGAAAGTCTAGGAGCTGAGGTGGATCCTGATACGTCTTGGTCAAGTTCTTTAGCTACACCACCCACCCTTAGTTCTACTGTGCTCATAG	94	-3.006	-28.74	-54	-1.93357
18	65	G>A	GGTCGTCAGACACCAAAACATATTTCTGAAAGTCTAGGAGCTGAGGTGGATCCTGATATGTCTTAGTCAAGTTCTTTAGCTACACCACCCACCCTTAGTTCTACTGTGCTCATAG	41	0.33	25.42	3.4	0.819581
19	66	G>A	GGTCGTCAGACACCAAAACATATTTCTGAAAGTCTAGGAGCTGAGGTGGATCCTGATATGTCTTGATCAAGTTCTTTAGCTACACCACCCACCCTTAGTTCTACTGTGCTCATAG	91	-0.95	-41.7	-47.3	0.56727
20	71	G>A	GGTCGTCAGACACCAAAACATATTTCTGAAAGTCTAGGAGCTGAGGTGGATCCTGATATGTCTTGGTCAAATTCTTTAGCTACACCACCCACCCTTAGTTCTACTGTGCTCATAG	73	-0.66	-79.01	-29.7	0.366659
21	71	G>T	GGTCGTCAGACACCAAAACATATTTCTGAAAGTCTAGGAGCTGAGGTGGATCCTGATATGTCTTGGTCAATTTCTTTAGCTACACCACCCACCCTTAGTTCTACTGTGCTCATAG	75	-1.07	-51.25	-37.8	-1.24078
22	83	C>A	GGTCGTCAGACACCAAAACATATTTCTGAAAGTCTAGGAGCTGAGGTGGATCCTGATATGTCTTGGTCAAGTTCTTTAGCTAAACCACCCACCCTTAGTTCTACTGTGCTCATAG	74	-0.96	-54.91	-65.6	-0.572819
23	83	C>T	GGTCGTCAGACACCAAAACATATTTCTGAAAGTCTAGGAGCTGAGGTGGATCCTGATATGTCTTGGTCAAGTTCTTTAGCTATACCACCCACCCTTAGTTCTACTGTGCTCATAG	74	2.05	11.29	-9.2	0.55735
24	86	C>G	GGTCGTCAGACACCAAAACATATTTCTGAAAGTCTAGGAGCTGAGGTGGATCCTGATATGTCTTGGTCAAGTTCTTTAGCTACACGACCCACCCTTAGTTCTACTGTGCTCATAG	90	0.63	23.76	9.4	0.00937323
25	94	delC	GGTCGTCAGACACCAAAACATATTTCTGAAAGTCTAGGAGCTGAGGTGGATCCTGATATGTCTTGGTCAAGTTCTTTAGCTACACCACCCACCTTAGTTCTACTGTGCTCATAG	89	-1.11	-32.8	-64.1	-1.18089
26	101	C>G	GGTCGTCAGACACCAAAACATATTTCTGAAAGTCTAGGAGCTGAGGTGGATCCTGATATGTCTTGGTCAAGTTCTTTAGCTACACCACCCACCCTTAGTTGTACTGTGCTCATAG	52	0.39	6.23	-2.5	-0.518178
27	103	A>G	GGTCGTCAGACACCAAAACATATTTCTGAAAGTCTAGGAGCTGAGGTGGATCCTGATATGTCTTGGTCAAGTTCTTTAGCTACACCACCCACCCTTAGTTCTGCTGTGCTCATAG	90	-1.93	-54.72	-67.8	-1.39821
28	104	C>T	GGTCGTCAGACACCAAAACATATTTCTGAAAGTCTAGGAGCTGAGGTGGATCCTGATATGTCTTGGTCAAGTTCTTTAGCTACACCACCCACCCTTAGTTCTATTGTGCTCATAG	42	0.16	-38.56	0	-0.596586
29	107	T>G	GGTCGTCAGACACCAAAACATATTTCTGAAAGTCTAGGAGCTGAGGTGGATCCTGATATGTCTTGGTCAAGTTCTTTAGCTACACCACCCACCCTTAGTTCTACTGGGCTCATAG	88	1.15	-49.85	0	-0.358497
30	109	C>T	GGTCGTCAGACACCAAAACATATTTCTGAAAGTCTAGGAGCTGAGGTGGATCCTGATATGTCTTGGTCAAGTTCTTTAGCTACACCACCCACCCTTAGTTCTACTGTGTTCATAG	89	-1.36	-33.69	0	-0.197391
31	111	C>A	GGTCGTCAGACACCAAAACATATTTCTGAAAGTCTAGGAGCTGAGGTGGATCCTGATATGTCTTGGTCAAGTTCTTTAGCTACACCACCCACCCTTAGTTCTACTGTGCTAATAG	92	-1.74	-44.26	0.1	-0.0681751
32	111	C>T	GGTCGTCAGACACCAAAACATATTTCTGAAAGTCTAGGAGCTGAGGTGGATCCTGATATGTCTTGGTCAAGTTCTTTAGCTACACCACCCACCCTTAGTTCTACTGTGCTTATAG	91
CFTR	exon 12	87 nt	41 mutants		0.714173	0.703037	0.780064	0.687053
				correl (r)	0.510044	0.494261	0.6085	0.472042
				r2	∆tESRseq	∆Hexplorer	∆HAL	∆SMS
	Exon position	Mutation	Exon sequence	PSI	0	0		-5.64954		r2	∆tESRseq	∆Hexplorer	∆HAL	∆SMS
0		WT	AGCAGTATACAAAGATGCTGATTTGTATTTATTAGACTCTCCTTTTGGATACCTAGATGTTTTAACAGAAAAAGAAATATTTGAAAG	80	-1.46	-95.57	-41.3	-7.66583		∆Hexplorer	0.570053	1	0.548165	0.595198
1	12	A>T	AGCAGTATACATAGATGCTGATTTGTATTTATTAGACTCTCCTTTTGGATACCTAGATGTTTTAACAGAAAAAGAAATATTTGAAAG	8	-0.55	-8.68	-17.8	-6.15188		∆HAL	0.7173	0.548165	1	0.540893
2	13	A>T	AGCAGTATACAATGATGCTGATTTGTATTTATTAGACTCTCCTTTTGGATACCTAGATGTTTTAACAGAAAAAGAAATATTTGAAAG	60	-2.19	-88.1	-40.3	-6.94054		∆SMS	0.611507	0.595198	0.540893	1
3	14	G>A	AGCAGTATACAAAAATGCTGATTTGTATTTATTAGACTCTCCTTTTGGATACCTAGATGTTTTAACAGAAAAAGAAATATTTGAAAG	10	-1.15	-62.02	-30.5	-6.89118
4	14	G>C	AGCAGTATACAAACATGCTGATTTGTATTTATTAGACTCTCCTTTTGGATACCTAGATGTTTTAACAGAAAAAGAAATATTTGAAAG	10	-2.65	-110.14	-48.2	-7.3234
5	14	G>T	AGCAGTATACAAATATGCTGATTTGTATTTATTAGACTCTCCTTTTGGATACCTAGATGTTTTAACAGAAAAAGAAATATTTGAAAG	5	-1	-81.07	-14.3	-6.42136
6	15	A>T	AGCAGTATACAAAGTTGCTGATTTGTATTTATTAGACTCTCCTTTTGGATACCTAGATGTTTTAACAGAAAAAGAAATATTTGAAAG	50	-1.97	-64.05	-36.8	-7.34434
7	15	A>G	AGCAGTATACAAAGGTGCTGATTTGTATTTATTAGACTCTCCTTTTGGATACCTAGATGTTTTAACAGAAAAAGAAATATTTGAAAG	35	-0.24	-79.13	-43.6	-6.23093
8	17	G>A	AGCAGTATACAAAGATACTGATTTGTATTTATTAGACTCTCCTTTTGGATACCTAGATGTTTTAACAGAAAAAGAAATATTTGAAAG	5	0.42	-15.1	-19.7	-6.5618
9	17	G>C	AGCAGTATACAAAGATCCTGATTTGTATTTATTAGACTCTCCTTTTGGATACCTAGATGTTTTAACAGAAAAAGAAATATTTGAAAG	45	-0.37	-70.25	-58.5	-6.98464
10	18	C>T	AGCAGTATACAAAGATGTTGATTTGTATTTATTAGACTCTCCTTTTGGATACCTAGATGTTTTAACAGAAAAAGAAATATTTGAAAG	5	-0.81	-30.13	-22.1	-7.10048
11	18	C>G	AGCAGTATACAAAGATGGTGATTTGTATTTATTAGACTCTCCTTTTGGATACCTAGATGTTTTAACAGAAAAAGAAATATTTGAAAG	40	-0.26	21.2	-17.8	-6.41822
12	19	T>A	AGCAGTATACAAAGATGCAGATTTGTATTTATTAGACTCTCCTTTTGGATACCTAGATGTTTTAACAGAAAAAGAAATATTTGAAAG	40	-1.3	-33.09	-19.1	-5.27355
13	25	G>A	AGCAGTATACAAAGATGCTGATTTATATTTATTAGACTCTCCTTTTGGATACCTAGATGTTTTAACAGAAAAAGAAATATTTGAAAG	25	-1.34	-16.88	-61	-6.15864
14	40	T>C	AGCAGTATACAAAGATGCTGATTTGTATTTATTAGACTCCCCTTTTGGATACCTAGATGTTTTAACAGAAAAAGAAATATTTGAAAG	5	-3.85	-78.58	-77.9	-8.06661
15	47	G>A	AGCAGTATACAAAGATGCTGATTTGTATTTATTAGACTCTCCTTTTAGATACCTAGATGTTTTAACAGAAAAAGAAATATTTGAAAG	0	-0.37	-49.59	-33.9	-6.84981
16	48	G>A	AGCAGTATACAAAGATGCTGATTTGTATTTATTAGACTCTCCTTTTGAATACCTAGATGTTTTAACAGAAAAAGAAATATTTGAAAG	5	-1.97	-52.42	-40.7	-6.32187
17	48	G>C	AGCAGTATACAAAGATGCTGATTTGTATTTATTAGACTCTCCTTTTGCATACCTAGATGTTTTAACAGAAAAAGAAATATTTGAAAG	7	-1.85	-56.16	-56.7	-6.82547
18	49	A>T	AGCAGTATACAAAGATGCTGATTTGTATTTATTAGACTCTCCTTTTGGTTACCTAGATGTTTTAACAGAAAAAGAAATATTTGAAAG	10	-2.61	-60.83	-74.6	-6.88448
19	49	A>G	AGCAGTATACAAAGATGCTGATTTGTATTTATTAGACTCTCCTTTTGGGTACCTAGATGTTTTAACAGAAAAAGAAATATTTGAAAG	10	0.96	46.29	18.3	-5.46863
20	50	T>G	AGCAGTATACAAAGATGCTGATTTGTATTTATTAGACTCTCCTTTTGGAGACCTAGATGTTTTAACAGAAAAAGAAATATTTGAAAG	10	-0.41	-19.71	-4.6	-6.01032
21	52	C>T	AGCAGTATACAAAGATGCTGATTTGTATTTATTAGACTCTCCTTTTGGATATCTAGATGTTTTAACAGAAAAAGAAATATTTGAAAG	15	-2.09	-16.37	-44.7	-8.03096
22	52	C>G	AGCAGTATACAAAGATGCTGATTTGTATTTATTAGACTCTCCTTTTGGATAGCTAGATGTTTTAACAGAAAAAGAAATATTTGAAAG	5	0.6	16.12	10.6	-5.87324
23	50	T>A	AGCAGTATACAAAGATGCTGATTTGTATTTATTAGACTCTCCTTTTGGAAACCTAGATGTTTTAACAGAAAAAGAAATATTTGAAAG	75	0.35	-9.28	5	-6.0779
24	12	A>G	AGCAGTATACAGAGATGCTGATTTGTATTTATTAGACTCTCCTTTTGGATACCTAGATGTTTTAACAGAAAAAGAAATATTTGAAAG	98	0.9	2.39	16	-5.62541
25	13	A>G	AGCAGTATACAAGGATGCTGATTTGTATTTATTAGACTCTCCTTTTGGATACCTAGATGTTTTAACAGAAAAAGAAATATTTGAAAG	95	1.03	44.54	15.8	-6.35608
26	16	T>A	AGCAGTATACAAAGAAGCTGATTTGTATTTATTAGACTCTCCTTTTGGATACCTAGATGTTTTAACAGAAAAAGAAATATTTGAAAG	95	1.98	-31.03	9.8	-5.5486
27	16	T>C	AGCAGTATACAAAGACGCTGATTTGTATTTATTAGACTCTCCTTTTGGATACCTAGATGTTTTAACAGAAAAAGAAATATTTGAAAG	95	-0.94	-55.12	-12.3	-7.49635
28	16	T>G	AGCAGTATACAAAGAGGCTGATTTGTATTTATTAGACTCTCCTTTTGGATACCTAGATGTTTTAACAGAAAAAGAAATATTTGAAAG	90	0.5	25.57	6.1	-5.54318
29	19	T>C	AGCAGTATACAAAGATGCCGATTTGTATTTATTAGACTCTCCTTTTGGATACCTAGATGTTTTAACAGAAAAAGAAATATTTGAAAG	95	1.73	8.19	12.4	-4.54146
30	19	T>G	AGCAGTATACAAAGATGCGGATTTGTATTTATTAGACTCTCCTTTTGGATACCTAGATGTTTTAACAGAAAAAGAAATATTTGAAAG	95	0.58	46.34	8.7	-4.39888
31	22	T>C	AGCAGTATACAAAGATGCTGACTTGTATTTATTAGACTCTCCTTTTGGATACCTAGATGTTTTAACAGAAAAAGAAATATTTGAAAG	90	0.95	86.92	9.5	-4.41113
32	28	T>C	AGCAGTATACAAAGATGCTGATTTGTACTTATTAGACTCTCCTTTTGGATACCTAGATGTTTTAACAGAAAAAGAAATATTTGAAAG	95	2.52	62.06	18.7	-3.06855
33	34	A>G	AGCAGTATACAAAGATGCTGATTTGTATTTATTGGACTCTCCTTTTGGATACCTAGATGTTTTAACAGAAAAAGAAATATTTGAAAG	100	-0.69	-5.09	-45.4	-5.79189
34	37	C>T	AGCAGTATACAAAGATGCTGATTTGTATTTATTAGATTCTCCTTTTGGATACCTAGATGTTTTAACAGAAAAAGAAATATTTGAAAG	100	-0.35	43.34	-16.9	-5.29599
35	40	T>A	AGCAGTATACAAAGATGCTGATTTGTATTTATTAGACTCACCTTTTGGATACCTAGATGTTTTAACAGAAAAAGAAATATTTGAAAG	90	1.1	66.23	0.9	-5.04745
36	40	T>G	AGCAGTATACAAAGATGCTGATTTGTATTTATTAGACTCGCCTTTTGGATACCTAGATGTTTTAACAGAAAAAGAAATATTTGAAAG	100	0.27	47.54	16.7	-5.17765
37	43	T>A	AGCAGTATACAAAGATGCTGATTTGTATTTATTAGACTCTCCATTTGGATACCTAGATGTTTTAACAGAAAAAGAAATATTTGAAAG	100	0.36	12.36	5	-5.37219
38	43	T>C	AGCAGTATACAAAGATGCTGATTTGTATTTATTAGACTCTCCCTTTGGATACCTAGATGTTTTAACAGAAAAAGAAATATTTGAAAG	90	2.35	77.53	16.4	-4.76387
39	43	T>G	AGCAGTATACAAAGATGCTGATTTGTATTTATTAGACTCTCCGTTTGGATACCTAGATGTTTTAACAGAAAAAGAAATATTTGAAAG	90	-0.23	-15.24	8.2	-5.21035
40	51	A>T	AGCAGTATACAAAGATGCTGATTTGTATTTATTAGACTCTCCTTTTGGATTCCTAGATGTTTTAACAGAAAAAGAAATATTTGAAAG	95	0.03	17.4	16.8	-4.86206
41	51	A>G	AGCAGTATACAAAGATGCTGATTTGTATTTATTAGACTCTCCTTTTGGATGCCTAGATGTTTTAACAGAAAAAGAAATATTTGAAAG	98
MLH1	ex 10	94 nt	15 mutants		0.723555	0.668742	0.499423	0.631917
				correl (r)	0.523532	0.447216	0.249423	0.399319
				r2	∆tESRseq	∆Hexplorer	∆HAL	∆SMS
	Exon position	Mutation	Exon sequence	PSI						r2	∆tESRseq	∆Hexplorer	∆HAL	∆SMS
0		WT	ATCGTCTGGTAGAATCAACTTCCTTGAGAAAAGCCATAGAAACAGTGTATGCAGCCTATTTGCCCAAAAACACACACCCATTCCTGTACCTCAG	79		0		0		∆Hexplorer	0.4166	1	0.400787	0.339311
1	3	C>A	ATAGTCTGGTAGAATCAACTTCCTTGAGAAAAGCCATAGAAACAGTGTATGCAGCCTATTTGCCCAAAAACACACACCCATTCCTGTACCTCAG	9	-2.25	-63.57	-15.4	-0.956604		∆HAL	0.098825	0.400787	1	0.519972
2	3	C>T	ATTGTCTGGTAGAATCAACTTCCTTGAGAAAAGCCATAGAAACAGTGTATGCAGCCTATTTGCCCAAAAACACACACCCATTCCTGTACCTCAG	27	-1.88	-65.88	-7.9	-0.539354		∆SMS	0.31909	0.339311	0.519972	1
3	4	G>A	ATCATCTGGTAGAATCAACTTCCTTGAGAAAAGCCATAGAAACAGTGTATGCAGCCTATTTGCCCAAAAACACACACCCATTCCTGTACCTCAG	50	-1.34	1.56	1.4	0.0977725
4	50	T>A	ATCGTCTGGTAGAATCAACTTCCTTGAGAAAAGCCATAGAAACAGTGTAAGCAGCCTATTTGCCCAAAAACACACACCCATTCCTGTACCTCAG	51	-0.56	-2.39	-19.4	-1.23674
5	52	C>T	ATCGTCTGGTAGAATCAACTTCCTTGAGAAAAGCCATAGAAACAGTGTATGTAGCCTATTTGCCCAAAAACACACACCCATTCCTGTACCTCAG	18	-1.15	-85.57	-69.8	-1.67635
6	55	C>G	ATCGTCTGGTAGAATCAACTTCCTTGAGAAAAGCCATAGAAACAGTGTATGCAGGCTATTTGCCCAAAAACACACACCCATTCCTGTACCTCAG	61	1.11	-26.75	-20.1	-1.01655
7	61	T>A	ATCGTCTGGTAGAATCAACTTCCTTGAGAAAAGCCATAGAAACAGTGTATGCAGCCTATTAGCCCAAAAACACACACCCATTCCTGTACCTCAG	67	-2.04	11.5	-15.3	-1.45093
8	13	A>G	ATCGTCTGGTAGGATCAACTTCCTTGAGAAAAGCCATAGAAACAGTGTATGCAGCCTATTTGCCCAAAAACACACACCCATTCCTGTACCTCAG	74	-0.002	5.95	-17.4	-0.415105
9	16	C>G	ATCGTCTGGTAGAATGAACTTCCTTGAGAAAAGCCATAGAAACAGTGTATGCAGCCTATTTGCCCAAAAACACACACCCATTCCTGTACCTCAG	81	0.59	-3.09	-28.5	-0.152194
10	66	A>C	ATCGTCTGGTAGAATCAACTTCCTTGAGAAAAGCCATAGAAACAGTGTATGCAGCCTATTTGCCCCAAAACACACACCCATTCCTGTACCTCAG	70	-0.09	-22.63	1.6	-0.00425692
11	71	C>T	ATCGTCTGGTAGAATCAACTTCCTTGAGAAAAGCCATAGAAACAGTGTATGCAGCCTATTTGCCCAAAAATACACACCCATTCCTGTACCTCAG	84	-0.34	-33.27	-30.7	-0.232271
12	85	T>C	ATCGTCTGGTAGAATCAACTTCCTTGAGAAAAGCCATAGAAACAGTGTATGCAGCCTATTTGCCCAAAAACACACACCCATTCCCGTACCTCAG	72	-0.35	8.83	5.4	-0.334662
13	24	T>G	ATCGTCTGGTAGAATCAACTTCCGTGAGAAAAGCCATAGAAACAGTGTATGCAGCCTATTTGCCCAAAAACACACACCCATTCCTGTACCTCAG	95	1.42	78.03	11.9	0.0493553
14	25	T>C	ATCGTCTGGTAGAATCAACTTCCTCGAGAAAAGCCATAGAAACAGTGTATGCAGCCTATTTGCCCAAAAACACACACCCATTCCTGTACCTCAG	95	1.66	84.35	18.4	0.963111
15	65	C>T	ATCGTCTGGTAGAATCAACTTCCTTGAGAAAAGCCATAGAAACAGTGTATGCAGCCTATTTGCCTAAAAACACACACCCATTCCTGTACCTCAG	90	-0.59	-63.76	-1.7	-0.275576
